# Supplementary material for: Acute to Subacute Atraumatic Entrapment Neuropathies in Patients With CMT1A: A Report of a Distinct Phenotypic Variant of CMT1A
Source: Frontiers journal article supplement (doi:10.3389/fneur.2022.826634), 2022-02-25
Supplement: Data_Sheet_1.pdf [file Data_Sheet_1.pdf]

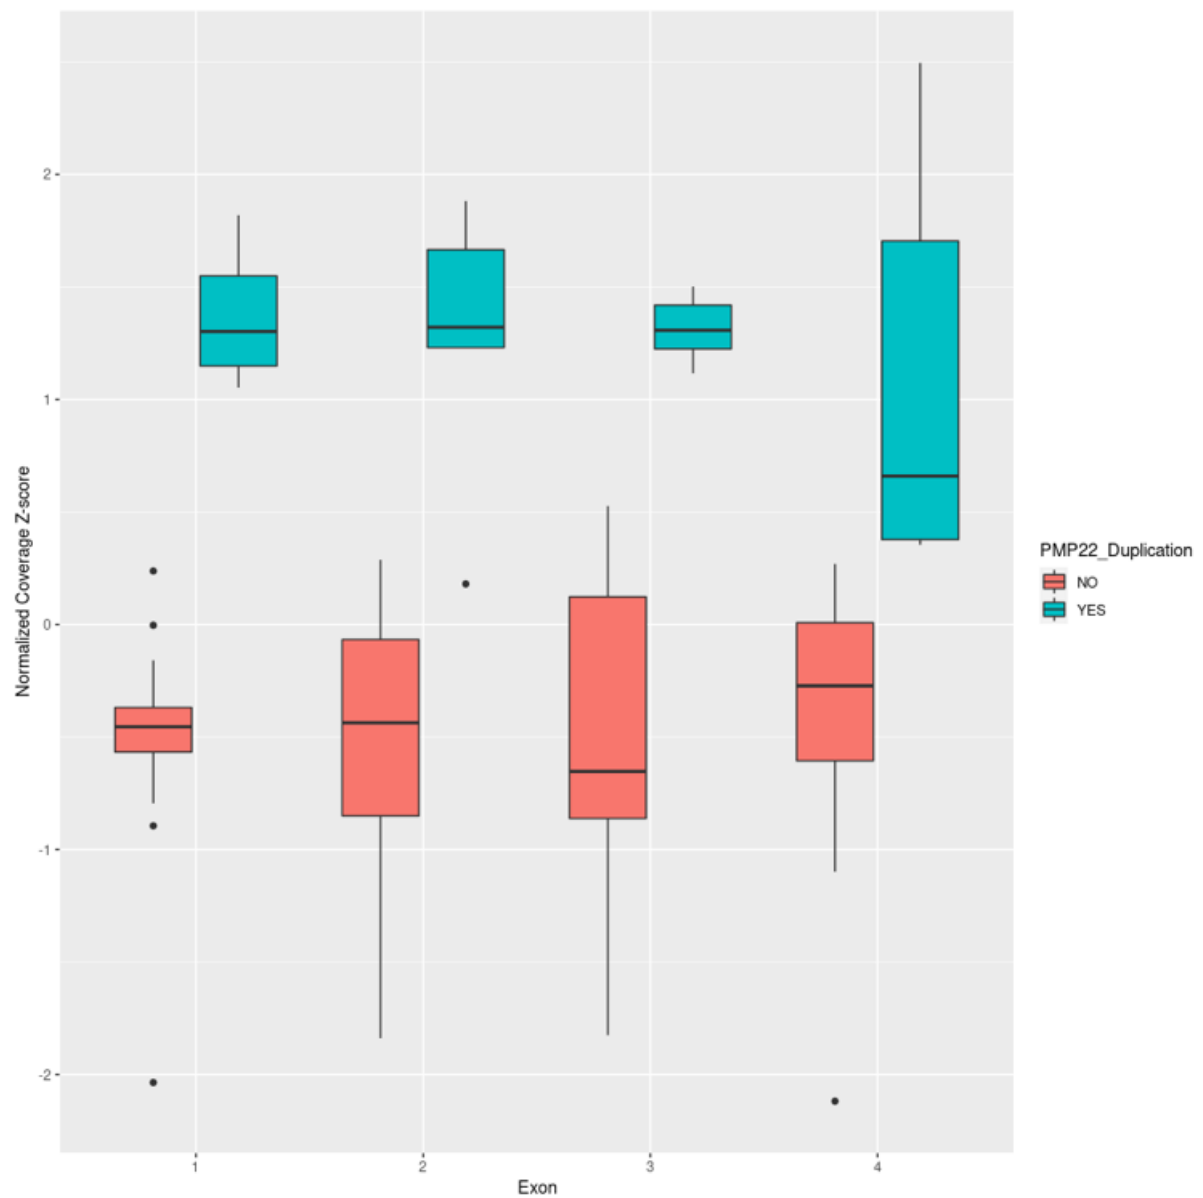

Supplementary figure: Copy Number Variant analysis of PMP22: For each sample, a value showing the coverage median z-score is provided. Green boxes represent samples with median z-score>1, indicating duplications in PMP22. Red boxes represent samples without PMP22 duplications.

|                             |      |                    | Spontaneous Activity |      | Motor Unit Potential |           |           |            |                     | Remarks                                                                                          |
|-----------------------------|------|--------------------|----------------------|------|----------------------|-----------|-----------|------------|---------------------|--------------------------------------------------------------------------------------------------|
| Muscle                      | Side | Insertion Activity | Fibs                 | PSW  | Polyphasia           | Amplitude | Duration  | Activation | Recruitment pattern |                                                                                                  |
| Tibialis anterior           | Left | Increased          | 2+                   | 2+   | Normal               | Reduced   | Reduced   | Normal     | Discrete            | Severe acute denervation changes <b>with discrete motor unit recruitment</b>                     |
| Biceps short head           | Left | Increased          | 1+                   | 1+   | Normal/1+            | Normal    | Normal    | Normal     | Slightly reduced    | Mild acute on chronic denervation changes <b>with slight reduction in motor unit recruitment</b> |
| Gastrocnemius medial head   | Left | Increased          | 1+                   | 1+   | Normal/1+            | Normal/1+ | Prolonged | Normal     | Slightly reduced    | Mild acute on chronic denervation <b>with slight reduction in motor unit recruitment</b>         |
| Vastus lateralis            | Left | Increased          | 1+                   | 1+   | Normal/1+            | Normal/1+ | Normal    | Normal     | Slightly reduced    | Mild acute on chronic denervation changes                                                        |
| L5 paraspinal               | Left | Normal             | None                 | None |                      |           |           |            |                     | Normal                                                                                           |
| First dorsal interossei     | Left | Increased          | 1+                   | 1+   | Normal               | Increased | Prolonged | Normal     | Discrete            | Severe acute-on-chronic denervation changes                                                      |
| Flexor carpi ulnaris        | Left | Increased          | None                 | None | Normal               | Normal/1+ | Prolonged | Normal     | Reduced             | Severe acute-on-chronic denervation changes                                                      |
| Extensor digitorum communis | Left | Increased          | None                 | None | 1+                   | Normal    | Normal    | Normal     | Slightly reduced    | Mild acute on chronic denervation changes                                                        |
| Biceps brachii              | Left | Normal             | None                 | None | Normal               | Normal    | Normal    | Normal     | Complete            | Normal                                                                                           |
| Triceps                     | Left | Normal             | None                 | None | Normal               | Normal/1+ | Normal    | Normal     | Complete            | Normal                                                                                           |
| Brachioradialis             | Left | Increased          | None                 | None | 1+                   | Normal/1+ | Normal    | Normal     | Slightly reduced    | Mild acute on chronic denervation changes                                                        |

Supplementary Table 1. Needle EMG findings for patient 2: Needle EMG findings for patient 2: Needle EMG changes are in keeping with disproportionate denervation localised to the left common peroneal nerve proximal to the left tibialis anterior and distal to the short head of the left biceps femoris (likely at the left fibular neck). This corresponds to the patient's neurological finding of a left foot drop. Needle EMG of the left medial gastrocnemius, a muscle innervated by a nerve of similar length compared to that of the left tibialis anterior only shows mild denervation changes **with slight reduction in motor unit recruitment**.

*[Fibs, fibrillation potentials; PSW, positive sharp waves]*

|                                    | Minimal Temporal Dispersion (duration increases by 30% or less) |                |                                   |                | Moderate Temporal Dispersion (duration increased by 31% to 60%) |                |
|------------------------------------|-----------------------------------------------------------------|----------------|-----------------------------------|----------------|-----------------------------------------------------------------|----------------|
| Nerve Segment<br>(proximal/distal) | Definite Partial Conduction Block                               |                | Probable Partial Conduction Block |                | Probable Partial Conduction Block                               |                |
|                                    | Amplitude Reduction                                             | Area Reduction | Amplitude Reduction               | Area Reduction | Amplitude Reduction                                             | Area Reduction |
| <b>Median</b>                      |                                                                 |                |                                   |                |                                                                 |                |
| Forearm (E/W)                      | >50%                                                            | >40%           | 40% to 49%                        | 30% to 39%     | >50%                                                            | >40%           |
| Arm (AX/E)                         | >50%                                                            | >40%           | 40% to 49%                        | 30% to 39%     | >50%                                                            | >40%           |
| <b>Ulnar</b>                       |                                                                 |                |                                   |                |                                                                 |                |
| Forearm (BE/W)                     | >50%                                                            | >40%           | 40% to 49%                        | 30% to 39%     | >50%                                                            | >40%           |
| Across Elbow (AE/BE)               | >50%                                                            | >40%           | 40% to 49%                        | 30% to 39%     | >50%                                                            | >40%           |
| Arm (AX/AE)                        | >50%                                                            | >40%           | 40% to 49%                        | 30% to 39%     | >50%                                                            | >40%           |
| <b>Radial</b>                      |                                                                 |                |                                   |                |                                                                 |                |
| Forearm (E/DF)                     | -                                                               | -              | >50%                              | >40%           | >60%                                                            | >50%           |
| Arm (AX/E)                         | -                                                               | -              | >50%                              | >40%           | >60%                                                            | >50%           |
| Proximal (EP/AX)                   | -                                                               | -              | >50%                              | >40%           | >60%                                                            | >50%           |
| <b>Peroneal</b>                    |                                                                 |                |                                   |                |                                                                 |                |
| Leg (BF/ankle)                     | >60%                                                            | >50%           | 50% to 59%                        | 40% to 49%     | >60%                                                            | >50%           |
| Across FH (AF/BF)                  | >50%                                                            | >40%           | 40% to 49%                        | 30% to 39%     | >50%                                                            | >40%           |
| <b>Tibial</b>                      |                                                                 |                |                                   |                |                                                                 |                |
| Leg (knee/ankle)                   | >60%                                                            | >50%           | 50% to 59%                        | 40% to 49%     | >60%                                                            | >50%           |

Supplemental table 2: Criteria for the diagnosis of definite and probable conduction block. Based on the 1999 Guidelines in Electrodiagnostic Medicine. American Association of Electrodiagnostic Medicine<sup>9</sup>

AE = Above Elbow; AF = Above Fibular Head; BE = Below Elbow; BF = Below Fibular Head; DF = Distal Forearm; E = Elbow; FA = Forearm; FH = Fibular Head W = Wrist

|          |       |         |         |          |
|----------|-------|---------|---------|----------|
| AARS     | EGR2  | IGHMBP2 | MORC2   | RAB7A    |
| AIFM1    | FBLN5 | INF2    | MPZ     | SBF1     |
| ARHGEF10 | FGD4  | KIF5A   | MTMR2   | SBF2     |
| ATP1A1   | FIG4  | LITAF   | NDRG1   | SGPL1    |
| BAG3     | GARS  | LMNA    | NEFH    | SH3TC2   |
| BSCL2    | GDAP1 | LRSAM1  | NEFL    | SLC25A46 |
| COX6A1   | GJB1  | MARS    | PDK3    | SPG11    |
| DHTKD1   | GNB4  | MCM3AP  | PLEKHG5 | SURF1    |
| DNAJB2   | HARS  | MED25   | PMP2    | TFG      |
| DNM2     | HINT1 | MFN2    | PMP22   | TRIM2    |
| DRP2     | HSPB1 | MICAL1  | PRPS1   | TRPV4    |
| DYNC1H1  | HSPB8 | MME     | PRX     | YARS     |

Supplemental Table 3. List of genes known to cause Charcot-Marie-Tooth disease evaluated in patients 1 and 2
